# Supplementary material for: Small molecule recognition of disease-relevant RNA structures
Source: Royal Society of Chemistry journal article supplement (doi:10.1039/d0cs00560f), 2020-01-01
Supplement: d0cs00560f1.xlsx [file d0cs00560f1.xlsx]

## Sheet: Sheet1
Compound	Associated Disease	Primary RNA Target(s)	Kd	Activity	Selectivity	References	Citations
Neo-S	Gastric Cancer	pre-miR-372 and -373	16 ± 8.8 nM for pre-miR-372 21.4 ± 5.8 nM for pre-miR-373	IC50 = 2.42 ± 0.06 µM (Inhibition of Dicer processing of pre-miR-372) IC50 = 5.13 ± 0.06 uM (Inhibition of Dicer processing of pre-miR-373)	Off-Targets: miR-17-5p, -21, -200b	32	D. D. Vo, C. Staedel, L. Zehnacker, R. Benhida, F. Darfeuille and M. Duca, ACS Chem. Biol., 2014, 9, 711–721.
Neo-S-Ar	Gastric Cancer	pre-miR-372 and -373	50.1 nM for pre-miR-372 34.7 nM for pre-miR-373	IC50 = 0.985 µM (Inhibition of Dicer processing of pre-miR-372) IC50 = 2.19 µM (Inhibition of Dicer processing of pre-miR-373)	Off-Targets: miR-17-5p, -21, -106b, -200b	35	D. D. Vo, T. P. Tran, C. Staedel, R. Benhida, F. Darfeuille, A. Di Giorgio and M. Duca, Chem. – Eur. J., 2016, 22, 5350–5362.
Neo-S-His	Gastric Cancer	pre-miR-372	16.5 ± 6.9 nM for pre-miR-372	IC50 = 0.79 ± 0.1 µM (Inhibition of Dicer processing of pre-miR-372)	Off targets: miR-21. Slight changes in expression levels of miR-371, -373, and -17 in compound treated AGS cells	36	D. D. Vo, C. Becquart, T. P. A. Tran, A. Di Giorgio, F. Darfeuille, C. Staedel and M. Duca, Org. Biomol. Chem., 2018, 16, 6262–6274.
PA-1	Gastric Cancer	pre-miR-372	150 ± 10 nM for pre-miR-372	IC50 = 1.06 ± 0.09 µM (Inhibition of Dicer processing of pre-miR-372)	Off-targets: let-7i, miR-22, -15a, -19a, -27a, -31	39	C. Staedel, T. P. A. Tran, J. Giraud, F. Darfeuille, A. Di Giorgio, N. J. Tourasse, F. Salin, P. Uriac and M. Duca, Sci. Rep., 2018, 8, 1667.
PA-3	Gastric Cancer	pre-miR-372	1.15 ± 0.3 µM for pre-miR-372	IC50 = 12.7 ± 0.1 µM (Inhibition of Dicer processing of pre-miR-372)	No appreciable affinity and activity, relative to miR-373 and 372, for a selection of miRNAs expressed in AGS cells.	40	C. Becquart, M. Le Roch, S. Azoulay, P. Uriac, A. Di Giorgio and M. Duca, ACS Omega, 2018, 3, 16500–16508.
TGP-18a	Prostate Cancer	pre-miR-18a	30 µM ± 2.3 for U bulge in pre-miR-17, -18a, and -20a Dicer binding sites (in the miR-17-92 cluster) 32 ± 5 µM for A bulge unqiue to miR-18a	IC50 = 10 µM (Inhibition of Dicer processing of miR-17, -18a, and -20a)	No effect on biogenesis of miR-19a, -19b, and -92 within the miR-17-92 cluster. No effect on expression of a selection of miRNAs expressed at low levels in DU145 cells	42	S. P. Velagapudi, Y. Luo, T. Tran, H. S. Haniff, Y. Nakai, M. Fallahi, G. J. Martinez, J. L. Childs-Disney and M. D. Disney, ACS Cent. Sci., 2017, 3, 205–216.
TGP-96	Triple Negative Breast Cancer	pri-miR-96	1.3 ± 0.1 µM for UU loop (motif present at Drosha processing site of pri-miR-96)	40 µM: Reduced expression levels of miR-96 by 90% in cells	No saturable binding to base-paired RNA or DNA observed (Kd > 30 µM).	43, 48	S. P. Velagapudi, S. M. Gallo and M. D. Disney, Nat. Chem. Biol., 2014, 10, 291–297. S. P. Velagapudi, M. D. Cameron, C. L. Haga, L. H. Rosenberg, M. Lafitte, D. R. Duckett, D. G. Phinney and M. D. Disney, Proc. Natl. Acad. Sci. U. S. A., 2016, 113, 5898–5903.
TGP-210	Triple Negative Breast Cancer	pre-miR-210	165 nM for CC loop of pre-miR-210	IC50 = 200 nM (Reduction of miR-210 levels in cells)	Kd = 620 nM for DNA Profiling of upregulated miRs in MDA-MB-231 cells under hypoxic conditions showed the compound is selective for miR-210. Comparable selectivity to antagomir.	45, 194	M. G. Costales, C. L. Haga, S. P. Velagapudi, J. L. Childs- Disney, D. G. Phinney and M. D. Disney, J. Am. Chem. Soc., 2017, 139, 3446–3455. M. G. Costales, B. Suresh, K. Vishnu and M. D. Disney, Cell Chem. Biol., 2019, 26, 1180–1186.
TGP-515/885	Triple Negative Breast Cancer	pri-miR-515 and -885	9.0 ± 1.0 µM for pri-miR-885 15 ± 1.9 µM for pri-miR-515	IC50 = 2 µM (Reduction of miR-515 and -885 levels in cells)	Data not collected	49	M. G. Costales, D. G. Hoch, D. Abegg, J. L. Childs-Disney, S. P. Velagapudi, A. Adibekian and M. D. Disney, J. Am. Chem. Soc., 2019, 141, 2960–2974.
TGP-515	Triple Negative Breast Cancer	pri-miR-515	940 ± 260 nM for pri-miR-515	IC50 = 200 nM (Reduction of miR-515 levels in cells)	No saturable binding observed for pri-miR-21, -107, and tRNA (Kd >50 µM). No effect on expression levels of other miRs predicted to interact with the SK1 3'UTR.	49	M. G. Costales, D. G. Hoch, D. Abegg, J. L. Childs-Disney, S. P. Velagapudi, A. Adibekian and M. D. Disney, J. Am. Chem. Soc., 2019, 141, 2960–2974.
TGP-377	Cardiovascular Disease	pre-miR-377	5 ± 1 nM for pre-miR-377	IC50 = 500 nM (Reduction of mature miR-377 levels in cells)	No off-targets detected among entire HUVEC miRNome (>200 miRNAs).	50	H. Haniff, L. Knerr, X. Liu, G. Crynen, J. Bostro ̈m, D. Abegg, A. Adibekian, M. Lemurell and M. Disney, ChemRxiv, 2019, DOI: 10.26434/chemrxiv.7967291.v1.
ADQ	Breast Cancer	HOTAIR (lncRNA)	∆G = -10.5	50% depletion in HOTAIR/EZH2 binding as determined by RT-qPCR	Selective for HOTAIR/EZH2 complex over MALAT1, HOTAIRM1, KCNQ1OT1, HOXA11, and XIST/EZH2 complexes.	69	Y. Ren, Y.-F. Wang, J. Zhang, Q.-X. Wang, L. Han, M. Mei and C.-S. Kang, Clin. Epigenet, 2019, 11, 29.
1	Lung Adenocarcinoma	MALAT1 (lncRNA)	2.9 ± 1.6 μM for MALAT1	1 µM: 54% reduction in MALAT1 levels and 38% decrease in organoid branching	Selective for MALAT1 over NEAT1 and KSVH PAN as determined by NMR.	65	F. A. Abulwerdi, W. Xu, A. A. Ageeli, M. J. Yonkunas, G. Arun, H. Nam, J. S. Schneekloth, T. K. Dayie, D. Spector, N. Baird and S. F. J. Le Grice, ACS Chem. Biol., 2019, 14, 223–235.
2	Lung Adenocarcinoma	MALAT1 (lncRNA)	6.1 ± 2.1 μM for MALAT1	1 µM: 41% reduction in MALAT1 levels and 27% decrease in organoid branching	Data not collected	65	F. A. Abulwerdi, W. Xu, A. A. Ageeli, M. J. Yonkunas, G. Arun, H. Nam, J. S. Schneekloth, T. K. Dayie, D. Spector, N. Baird and S. F. J. Le Grice, ACS Chem. Biol., 2019, 14, 223–235.
1a	Fragile X-Associated Tremor and Ataxia Syndrome	r(CGG)exp in 5’ UTR of FMR1	76 ± 4 nM for r(CGG)12	IC50 = 13 ± 0.4 µM (Disruption of r(CCG)12:DGCR8Δ complex) 100 µM: Rescued splicing defects by ~60% in cells 10 µM: Reduced foci levels by ~50% in cells	Demonstrated lower binding affinity, compared to r(CGG)12, for two base-paired RNA analogs (Kd's not reported).	79-81, 141	D. Colak, N. Zaninovic, M. S. Cohen, Z. Rosenwaks, W. Y. Yang, J. Gerhardt, M. D. Disney and S. R. Jaffrey, Science, 2014, 343, 1002–1005. M. D. Disney, B. Liu, W. Y. Yang, C. Sellier, T. Tran, N. Charlet-Berguerand and J. L. Childs-Disney, ACS Chem. Biol., 2012, 7, 1711–1718. D. Kumari and K. Usdin, Hum. Mol. Genet., 2016, 25, 3689–3698. W. Y. Yang, F. He, R. L. Strack, S. Y. Oh, M. Frazer, S. R…
1a	c9FTD/ALS	r(G4C2)exp in Intron 1 of C9orf72	9.7 ± 1 µM for r(G4C2)8	2 µM: Reduced poly(GP) inclusions and foci levels by ~50% in iNeurons	Kd = 8.4 ± 3.2 µM for r(CGG)12 Kd = 82 ± 6 µM for G-quadruplex No saturable binding to base-paired RNA (Kd > 50 µM).	142-144	Z. Su, Y. J. Zhang, T. F. Gendron, P. O. Bauer, J. Chew, W. Y. Yang, E. Fostvedt, K. Jansen-West, V. V. Belzil, P. Desaro, A. Johnston, K. Overstreet, S. Y. Oh, P. K. Todd, J. D. Berry, M. E. Cudkowicz, B. F. Boeve, D. Dickson, M. K. Floeter, B. J. Traynor, C. Morelli, A. Ratti, V. Silani, R. Rademakers, R. H. Brown, J. D. Rothstein, K. B. Boylan, L. Petrucelli and M. D. Disney, Neuron, 2014, 83,…
NVS-SM2 (Branaplam Derivative)	Spinal Muscular Atrophy	5’ Spice Site of SMN2 Exon 7	Data not collected	EC50 = 5 nM (SMN protein detected by ELISA)	Interacts with dsRNA as determined by NMR.	97-98	A. N. Calder, E. J. Androphy and K. J. Hodgetts, J. Med. Chem., 2016, 59, 10067–10083. J. Palacino, S. E. Swalley, C. Song, A. K. Cheung, L. Shu, X. Zhang, M. Van Hoosear, Y. Shin, D. N. Chin, C. G. Keller, M. Beibel, N. A. Renaud, T. M. Smith, M. Salcius, X. Shi, M. Hild, R. Servais, M. Jain, L. Deng, C. Bullock, M. McLellan, S. Schuierer, L. Murphy, M. J. Blommers, C. Blaustein, F. Berenshteyn,…
SMN-C5 (Risdiplam Derivative)	Spinal Muscular Atrophy	5’ Spice Site and ESE2 of SMN2 Exon 7	Binding to RNA duplex modeling the U1snRNP:SMN2 interaction confirmed via NMR, but not quantified.	EC50 = 15 nM (SMN protein detected by ELISA)	Binds STRN3 exon 8 as determined by SPR.	97, 104, 107	A. N. Calder, E. J. Androphy and K. J. Hodgetts, J. Med. Chem., 2016, 59, 10067–10083. M. Sivaramakrishnan, K. D. McCarthy, S. Campagne, S. Huber, S. Meier, A. Augustin, T. Heckel, H. Meistermann, M. N. Hug, P. Birrer, A. Moursy, S. Khawaja, R. Schmucki, N. Berntenis, N. Giroud, S. Golling, M. Tzouros, B. Banfai, G. Duran-Pacheco, J. Lamerz, Y. Hsiu Liu, T. Luebbers, H. Ratni, M. Ebeling, A. Cl ́…
Mitoxantrone	Frontotemporal Dementia and Parkinsonism	SRE in 5’ Splice Site of MAPT Exon 10	< 1 µM for the SRE in MAPT Exon 10	EC50 = 720 nM (Stabilization of SRE in MAPT Exon 10 )	Authors suggest mitoxantrone is a structurally privledged intercalator with sequence specificity based on bonding interactions identified via NMR.	118	S. Zheng, Y. Chen, C. P. Donahue, M. S. Wolfe and G. Varani, Chem. Biol., 2009, 16, 557–566.
A-1	Frontotemporal Dementia and Parkinsonism-17	SRE in 5’ Splice Site of MAPT Exon 10	3.8 ± 0.5 µM for the SRE in MAPT Exon 10	10 µM: Reduced 4R to 3R tau ratio by ~50% in cells	EC50 = 2.9 ± 0.6 µM for A-bulge (target) motif RNA construct EC50 = 29.7 ± 3.3 for C-bulge (off-target) motif RNA construct (Determined by 2-AP competition assays)	120	J. L. Chen, P. Zhang, M. Abe, H. Aikawa, L. Zhang, A. J. Frank, T. Zembryski, C. Hubbs, H. Park, J. Withka, C. Steppan, L. Rogers, S. Cabral, M. Pettersson, T. T. Wager, M. A. Fountain, G. Rumbaugh, J. L. Childs- Disney and M. D. Disney, J. Am. Chem. Soc., 2020, 142, 8706–8727.
A-2	Frontotemporal Dementia and Parkinsonism-17	SRE in 5’ Splice Site of MAPT Exon 10	11.5 ± 2.9 µM for the SRE in MAPT Exon 10	25 µM: Reduced 4R to 3R tau ratio by ~50% in cells	No saturable binding to off-target RNA constructs (EC50 > 100 µM as determined by 2-AP competition assay)	120	J. L. Chen, P. Zhang, M. Abe, H. Aikawa, L. Zhang, A. J. Frank, T. Zembryski, C. Hubbs, H. Park, J. Withka, C. Steppan, L. Rogers, S. Cabral, M. Pettersson, T. T. Wager, M. A. Fountain, G. Rumbaugh, J. L. Childs- Disney and M. D. Disney, J. Am. Chem. Soc., 2020, 142, 8706–8727.
A-3	Frontotemporal Dementia and Parkinsonism-17	SRE in 5’ Splice Site of MAPT Exon 10	8.3 ± 1.4 µM for the SRE in MAPT Exon 10	25 µM: Reduced 4R to 3R tau ratio by ~50% in cells	No saturable binding to off-target RNA constructs (EC50 > 100 µM as determined by 2-AP competition assay)	120	J. L. Chen, P. Zhang, M. Abe, H. Aikawa, L. Zhang, A. J. Frank, T. Zembryski, C. Hubbs, H. Park, J. Withka, C. Steppan, L. Rogers, S. Cabral, M. Pettersson, T. T. Wager, M. A. Fountain, G. Rumbaugh, J. L. Childs- Disney and M. D. Disney, J. Am. Chem. Soc., 2020, 142, 8706–8727.
A-4	Frontotemporal Dementia and Parkinsonism-17	SRE in 5’ Splice Site of MAPT Exon 10	9.6 ± 1.9 µM for the SRE in MAPT Exon 10	25 µM: Reduced 4R to 3R tau ratio by ~50% in cells	No saturable binding to off-target RNA constructs (EC50 > 100 µM as determined by 2-AP competition assay)	120	J. L. Chen, P. Zhang, M. Abe, H. Aikawa, L. Zhang, A. J. Frank, T. Zembryski, C. Hubbs, H. Park, J. Withka, C. Steppan, L. Rogers, S. Cabral, M. Pettersson, T. T. Wager, M. A. Fountain, G. Rumbaugh, J. L. Childs- Disney and M. D. Disney, J. Am. Chem. Soc., 2020, 142, 8706–8727.
A-5	Frontotemporal Dementia and Parkinsonism-17	SRE in 5’ Splice Site of MAPT Exon 10	4.9 ± 0.9 µM for the SRE in MAPT Exon 10	10 µM: Reduced 4R to 3R tau ratio by ~50% in cells	Data not collected	120	J. L. Chen, P. Zhang, M. Abe, H. Aikawa, L. Zhang, A. J. Frank, T. Zembryski, C. Hubbs, H. Park, J. Withka, C. Steppan, L. Rogers, S. Cabral, M. Pettersson, T. T. Wager, M. A. Fountain, G. Rumbaugh, J. L. Childs- Disney and M. D. Disney, J. Am. Chem. Soc., 2020, 142, 8706–8727.
2H-K4NMe	Myotonic Dystrophy Type 1	r(CUG)exp in the 3’ UTR of DMPK	13.2 ± 1.1 nM for r(CUG)12	IC50 = 25 µM (Disruption of r(CUG)12-MBNL1 complex 10 µM: 55% cTNT Exon 5 inclusion	63-fold selectivity over r(CAG)12 30-fold selectivity over r(AU)12 103-fold selectivity over r(GC)8 (Values determined by Kobs relative to r(CUG)12)	130	S. G. Rzuczek, Y. Gao, Z. Z. Tang, C. A. Thornton, T. Kodadek and M. D. Disney, ACS Chem. Biol., 2013, 8, 2312–2321.
2H-K4NMeS	Myotonic Dystrophy Type 1	r(CUG)exp in the 3’ UTR of DMPK	282 ± 94 nM for r(CUG)12 12.4 ± 1.4 nM for r(CUG)109	1 µM: Rescued MBNL1 splicing defects by ~80%	No saturable binding observed for base-paired RNA, DNA, and tRNA (Kd >50 µM)	131	S. G. Rzuczek, L. A. Colgan, Y. Nakai, M. D. Cameron, D. Furling, R. Yasuda and M. D. Disney, Nat. Chem. Biol., 2017, 13, 188–193.
3	Myotonic Dystrophy Type 1	r(CUG)exp in the 3’ UTR of DMPK	430 nM for r(CUG)4	IC50 = 52 ± 20 µM (Inhibition of r(CUG)4:MBNL1 complex) IC50 = 46 ± 7 µM (Inhibition of r(CUG)12:MBNL! Complex)	Kd = 500 ± 200nM for d(CTG)4 Kd = 390 ± 80nM for d(CTG)2	133	J. F. Arambula, S. R. Ramisetty, A. M. Baranger and S. C. Zimmerman, Proc. Natl. Acad. Sci. U. S. A., 2009, 106, 16068–16073.
4	Myotonic Dystrophy Type 1	r(CUG)exp in the 3’ UTR of DMPK	Data not collected	Reduced r(CUG)960 and foci levels and rescued splicing defects in an r(CUG)960 mouse model	Also Acts as a Transcriptional Inhbitor of d(CTG)74: IC50 = 100 nM	136	J. Lee, Y. Bai, U. V. Chembazhi, S. Peng, K. Yum, L. M. Luu, L. D. Hagler, J. F. Serrano, H. Y. E. Chan, A. Kalsotra and S. C. Zimmerman, Proc. Natl. Acad. Sci. U. S. A., 2019, 116, 8709–8714.
DAP	Myotonic Dystrophy Type 1	r(CUG)exp in the 3’ UTR of DMPK	Kd was not measured directly ΔTm = 7.8˚C for r(CUG)9 DAP:r(CUG)9 complex detected by ESI-TOF	25 µM: Inhibited in vitro translation by ~50%.	SPR analysis showed preferential binding to r(CUG)9 and r(CGG)9 among r(CXG)9 sequences. At high doses inhibition of canonical in vitro transcription was observed.	137	J. Li, J. Matsumoto, L.-P. Bai, A. Murata, C. Dohno and K. Nakatani, Chem. – Eur. J., 2016, 22, 14881–14889.
5	Myotonic Dystrophy Type 2	r(CCUG)exp in Intron 1 of CNBP	97 ± 15 nM for r(CCUG)12	IC50 = 89 nM (Inhibition of r(CCUG)12:MBNL1 complex) 5 µM: Rescued splicing defects in cells and eliminated ~20% of the retained intron in CNBP mRNA	No saturable binding to DNA or a base-paired RNA observed (Kd > 5 µM).	138-140	M. M. Lee, A. Pushechnikov and M. D. Disney, ACS Chem. Biol., 2009, 4, 345–355. R. I. Benhamou, A. J. Angelbello, R. J. Andrews, E. T. Wang, W. N. Moss and M. D. Disney, ACS Chem. Biol., 2020, 15, 485–493. R. I. Benhamou, A. J. Angelbello, E. T. Wang and M. D. Disney, Cell Chem. Biol., 2020, 27, 223–231.
2HE-5NMe	Fragile X-Associated Tremor and Ataxia Syndrome	r(CGG)exp in 5’ UTR of FMR1	50 ± 0.6 nM for r(CGG)12	In vitro IC50 = 3.5 ± 0.6 µM (Inhibition of r(CGG)12:DGCR8Δ complex). 50 µM: Rescused splicing defects to match WT splicing patterns, prevented ~75% of foci formation, disrupted ~60% of preformed foci, and inhibited ~80% of RANT.	Kd = 200 nM for base-paired RNA	141	W. Y. Yang, F. He, R. L. Strack, S. Y. Oh, M. Frazer, S. R. Jaffrey, P. K. Todd and M. D. Disney, ACS Chem. Biol., 2016, 11, 2456–2465.
6	c9FTD/ALS	r(G4C2)exp in Intron 1 of C9orf72	10 ± 2 µM for r(G4C2)8	100 µM: Reduced poly(GP), poly(GA), and foci levels by ~60% in cells transfected with r(G4C2)66. Toxic in iNeurons.	Kd = 7.2 ± 2.0 µM for r(CGG)12. No saturable binding to base-paired RNA (Kd > 40 µM) or G-quadruplex r(G4C2)8 RNA (Kd > 100 µM).	142	Z. Su, Y. J. Zhang, T. F. Gendron, P. O. Bauer, J. Chew, W. Y. Yang, E. Fostvedt, K. Jansen-West, V. V. Belzil, P. Desaro, A. Johnston, K. Overstreet, S. Y. Oh, P. K. Todd, J. D. Berry, M. E. Cudkowicz, B. F. Boeve, D. Dickson, M. K. Floeter, B. J. Traynor, C. Morelli, A. Ratti, V. Silani, R. Rademakers, R. H. Brown, J. D. Rothstein, K. B. Boylan, L. Petrucelli and M. D. Disney, Neuron, 2014, 83,…
7	c9FTD/ALS	r(G4C2)exp in Intron 1 of C9orf72	16 ± 2 µM for r(G4C2)8	100 µM: Reduced poly(GP) levels by ~20% in cells transfected with r(G4C2)66.	Kd = 16 ± 4 µM for r(CGG)12. Kd = 170 ± 16 µM for G-quadruplex r(G4C2)8 RNA. No saturable binding to base-paired RNA (Kd > 50 µM).	142	Z. Su, Y. J. Zhang, T. F. Gendron, P. O. Bauer, J. Chew, W. Y. Yang, E. Fostvedt, K. Jansen-West, V. V. Belzil, P. Desaro, A. Johnston, K. Overstreet, S. Y. Oh, P. K. Todd, J. D. Berry, M. E. Cudkowicz, B. F. Boeve, D. Dickson, M. K. Floeter, B. J. Traynor, C. Morelli, A. Ratti, V. Silani, R. Rademakers, R. H. Brown, J. D. Rothstein, K. B. Boylan, L. Petrucelli and M. D. Disney, Neuron, 2014, 83,…
8	c9FTD/ALS	r(G4C2)exp in Intron 1 of C9orf72	260 ± 30 nM for r(G4C2)8	In vitro IC50 = 19 µM (Inhibition of r(G4C2)8:hnRNP H complex) IC50 = 1.6 ± 0.20 µM (Inhibition of RANT in cells transfected with r(G4C2)66) 5 µM: Reduced foci formation by 2-fold in cells transfected with r(G4C2)66.	Kd = 310 ± 10 nM for d(G4C2)8 Kd = 79 ± 59 µM for r(G2C4)8 Kd = 140 ± 90 µM for base-paired RNA	143	Z. F. Wang, A. Ursu, J. L. Childs-Disney, R. Guertler, W. Y. Yang, V. Bernat, S. G. Rzuczek, R. Fuerst, Y. J. Zhang, T. F. Gendron, I. Yildirim, B. G. Dwyer, J. E. Rice, L. Petrucelli and M. D. Disney, Cell Chem. Biol., 2019, 26, 179–190.
2H-5-CA-Biotin	Fragile X-Associated Tremor and Ataxia Syndrome	r(CGG)exp in 5’ UTR of FMR1	N/A: Covalent RNA Binder	2.5 µM: Covalently reacted with ~60% of r(CGG)12 in vitro. 500 nM: Inhibited RANT by ~40% and rescued splicing defects by ~10% in cells.	Chem-CLIP enrichment studies demonstrated compound selectivity for r(CGG)exp in the 5' UTR of FMR1.	153	W.-Y. Yang, H. D. Wilson, S. P. Velagapudi and M. D. Disney, J. Am. Chem. Soc., 2015, 137, 5336–5345.
Synucleozid	Parkinson’s Disease	IRE in 5’ UTR of SNCA	1.46 ± 0.26 µM for SNCA IRE	1 µM: Reduced α-synuclein expression by ~70% in cells	1 µM: Also reduced ferritin levels in cells by ~50%. No saturable binding to base-paired RNA or tRNA (Kd > 50 µM). Proteome-wide analysis showed 11% of proteins were affected by compound treatment. Transcriptome-wide anlysis showed 99.7% of genes were unchanged by compound treatment.	162	P. Zhang, H. J. Park, J. Zhang, E. Junn, R. J. Andrews, S. P. Velagapudi, D. Abegg, K. Vishnu, M. G. Costales, J. L. Childs-Disney, A. Adibekian, W. N. Moss, M. M. Mouradian and M. D. Disney, Proc. Natl. Acad. Sci. U. S. A., 2020, 117, 1457–1467.
TGP-96-Bleo	Triple Negative Breast Cancer	pri-miR-96	64 ± 11 nM for pri-miR-96	50 nM: Reduced mature miR-96 levels by ~55% and increased FOXO1 expression 2-fold in cells.	No saturable binding to DNA (Kd > 30 µM). MiRNA-profiling showed miR-96 levels were the most significantly affected in cells.	181	Y. Li and M. D. Disney, ACS Chem. Biol., 2018, 13, 3065–3071.
Cugamycin	Myotonic Dystrophy Type 1	r(CUG)exp in the 3’ UTR of DMPK	EC50 = 365 ± 75 nM for r(CUG)12	1 µM: Reduced levels of r(CUG)1300-containing DMPK transcripts by ~70%, rescued splicing defects by ~40%, and reduced foci levels by ~30% in cells. Mouse Model: (10mg/kg, i.p. injected every other day) - Decreased r(CUG)250-containing HSA transgene, rescued splicing defects, restored CLCN1 levels, and reduced myotonia.	No saturable binding to DNA (Kd > 50 µM). In a panel of seven r(CUG) repeat-containning trancripts, only DMPK was affeted.	185	A. J. Angelbello, S. G. Rzuczek, K. K. Mckee, J. L. Chen, H. Olafson, M. D. Cameron, W. N. Moss, E. T. Wang and M. D. Disney, Proc. Natl. Acad. Sci. U. S. A., 2019, 116, 7799–7804.
5-Bleo	Myotonic Dystrophy Type 2	r(CCUG)exp in Intron 1 of CNBP	106 ± 23 nM for r(CCUG)12	5 µM: Rescued splicing defects, eliminated ~50% of the retained intron in CNBP mRNA, reduced foci, and reduced mature CNBP mRNA levels by ~25%	Selective for r(CCUG)exp over shorter repeats. No saturable binding to DNA observed (Kd > 5 µM). Demonstrated enhanced selectivity compared to an ASO.	139	R. I. Benhamou, A. J. Angelbello, R. J. Andrews, E. T. Wang, W. N. Moss and M. D. Disney, ACS Chem. Biol., 2020, 15, 485–493.
TGP-96 RIBOTAC	Triple Negative Breast Cancer	pri-miR-96	20 nM for pri-miR-96	200 nM: Reduced pri-miR-96 and mature miR-96 levels by >50% in cells. Induced elevation of FOXO1 expression by 2-fold.	No saturable binding to a base-paired RNA (Kd > 5 µM). Selective for pri-miR-96 across a panel of 16 miRs predicted to target the FOXO1 3' UTR.	191	M. G. Costales, Y. Matsumoto, S. P. Velagapudi and M. D. Disney, J. Am. Chem. Soc., 2018, 140, 6741–6744.
TGP-210 RIBOTAC	Triple Negative Breast Cancer	pre-miR-210	190 nM for pre-miR-210 340 nM for pre-miR-210 in the presence of RNase L	200 nM: Reduced pre-miR-210 and mature miR-210 levels by ~50% in cells.	Kd = 1.2 µM for DNA (10-fold selectivity window compared to pre-miR-210). DNA binding was completely ablated in the presence of RNase L (Kd >20 µM). No saturable binding was observed to a mutated miR-210 RNA (Kd > 20 µM).	194	M. G. Costales, B. Suresh, K. Vishnu and M. D. Disney, Cell Chem. Biol., 2019, 26, 1180–1186.
TGP-21	Triple Negative Breast Cancer	pre-miR-21	980 ± 97 nM for pre-miR-21	IC50 = 1 µM (Reduction of miR-21 levels in cells). 1 µM: ~50% increase in PDCD4 expression in cells. 10 µM: ~50% increase in PTEN expression in cells.	No saturable binding to base-paired RNA (Kd > 100 µM). Full miR profiling showed TGP-21 was selective for miR-21. Gini coefficient = 0.68.	195	M. G. Costales, H. Aikawa, Y. Li, J. L. Childs-Disney, D. Abegg, D. G. Hoch, S. Pradeep Velagapudi, Y. Nakai, T. Khan, K. W. Wang, I. Yildirim, A. Adibekian, E. T. Wang and M. D. Disney, Proc. Natl. Acad. Sci. U. S. A., 2020, 117, 2406–2411.
TGP-21 RIBOTAC	Triple Negative Breast Cancer	pre-miR-21	Data not collected	IC50 = 50 nM (Reduction of miR-21 levels in cells). Mouse Model: (10mg/kg, q.o.d., every other day) - Inhibited breast cancer metastasis to lung, decreased pre- and mature miR-21 levels and increased PDCD4 expression.	Transcriptome- and proteome-wide profiling showed TGP-21 RIBOTAC was selective for miR-21. Gini coefficient = 0.84.	195	M. G. Costales, H. Aikawa, Y. Li, J. L. Childs-Disney, D. Abegg, D. G. Hoch, S. Pradeep Velagapudi, Y. Nakai, T. Khan, K. W. Wang, I. Yildirim, A. Adibekian, E. T. Wang and M. D. Disney, Proc. Natl. Acad. Sci. U. S. A., 2020, 117, 2406–2411.
TGP-17-92	Prostate and Triple Negative Breast Cancer	pre-miR-17, -18a, -20a	120 ± 20 nM for pre-miR-17 and pre-miR-20a 124 ± 22 nM for pre-miR-18a	In vitro IC50 = ~1 µM (Inhibition of Dicer processing of pre-miR-17, -18a, and 20a) 500 nM: Reduced levels of miR-17, -18a, and -20a by ~45% in cells and increased levels of Zbtb4 mRNA by 1.4-fold.	No saturable binding to base-paired RNAs (Kd = >100 µM).	205	X. Liu, H. S. Haniff, J. L. Childs-Disney, A. Shuster, H. Aikawa, A. Adibekian and M. D. Disney, J. Am. Chem. Soc., 2020, 142, 6970–6982.
TGP-17-92 Bleo	Prostate and Triple Negative Breast Cancer	pri-miR-17-92	Data not collected	In vitro IC50 = 500 nM (Cleavage of pre-miR-17) 100 nM: Reduced pri-miR-17-92 levels by ~35% in cells. 500 nM: Increased ZBTB4 mRNA levels by ~35% and protein levels by ~62% in cells.	No cleavage observed with base-paired RNA. No significant DNA cleavage observed. Profiling of a panel of 30 miRs sharing one of the two binding site for TGP-17-92 showed TGP-17-92 Bleo was selective for the miR-17-92 cluster.	205	X. Liu, H. S. Haniff, J. L. Childs-Disney, A. Shuster, H. Aikawa, A. Adibekian and M. D. Disney, J. Am. Chem. Soc., 2020, 142, 6970–6982.
TGP-17-92 RIBOTAC	Prostate and Triple Negative Breast Cancer	pre-miR-17, -18a, -20a	Data not collected	500 nM: Reduced pre-miR-17 levels by ~30%, pre-miR-18a levels by ~20% and pre-miR-20a levels by ~35% in cells.	Selectivity data specific for TGP-17-92 RIBOTAC was not collected.	205	X. Liu, H. S. Haniff, J. L. Childs-Disney, A. Shuster, H. Aikawa, A. Adibekian and M. D. Disney, J. Am. Chem. Soc., 2020, 142, 6970–6982.
